# Supplementary material for: Evaluating the effect of alternative carbon allocation schemes in a land surfacemodel (CLM4.5) on carbon fluxes, pools and turnover in temperate forests
Source: Copernicus journal article supplement (doi:10.5194/gmd-2017-74), 2017-03-21
Supplement: Supplementary file 1 [file gmd-2017-74-supplement.pdf]

## **SUPPLEMENTARY FIGURES**

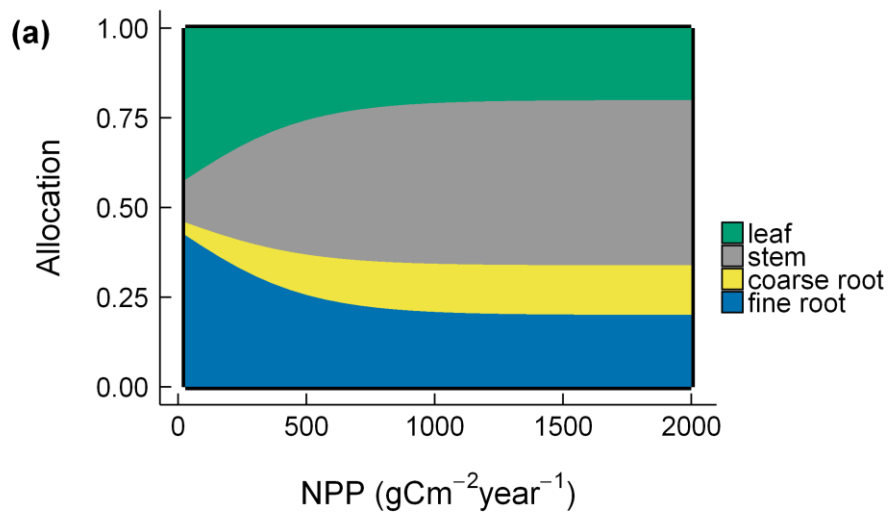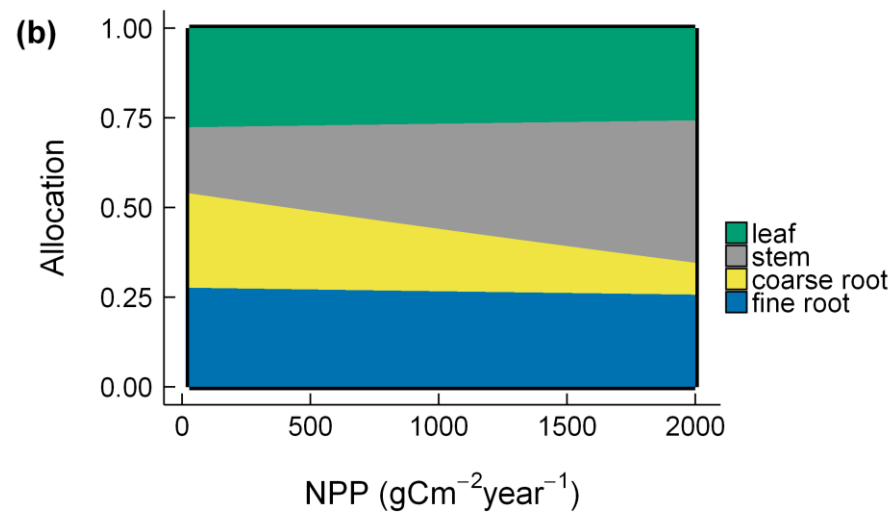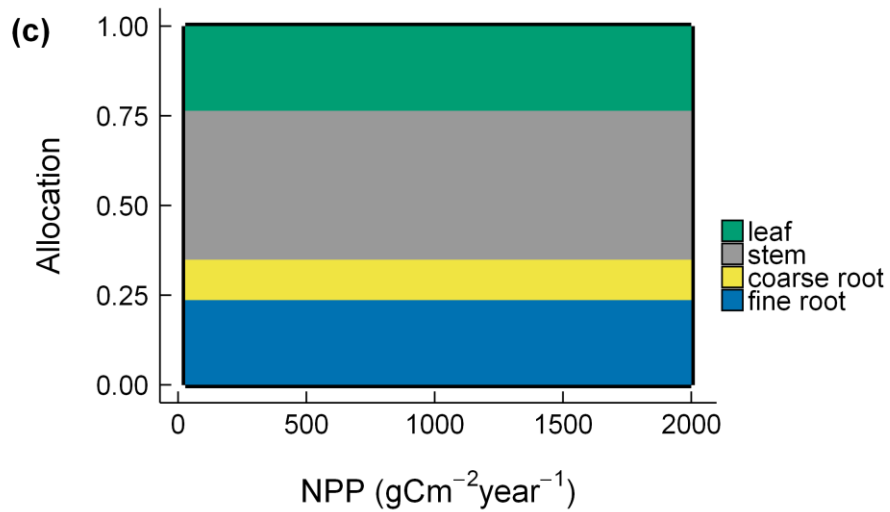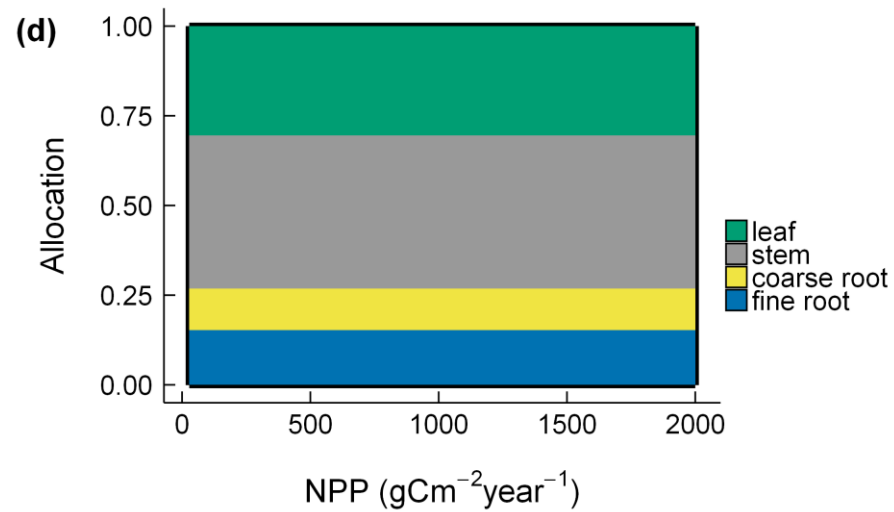

**Figure S1.** Carbon allocation to the different plant pools (leaf, stem, coarse root, and fine root) as a function of annual Net Primary Productivity (NPP) in: (a) D-CLM C allocation scheme described in Oleson et al., 2013; (b) D-Litton C allocation scheme based on Litton et al., 2007; (c) F-Evergreen C allocation scheme based on Luysaert et al., 2007; (d) F-Deciduous C allocation scheme based on Luysaert et al., 2007.

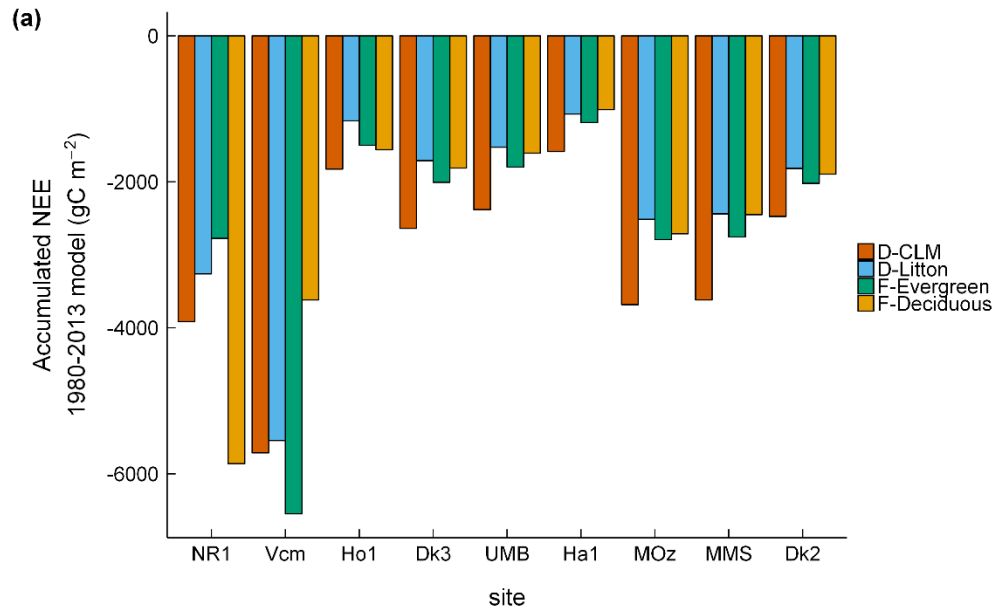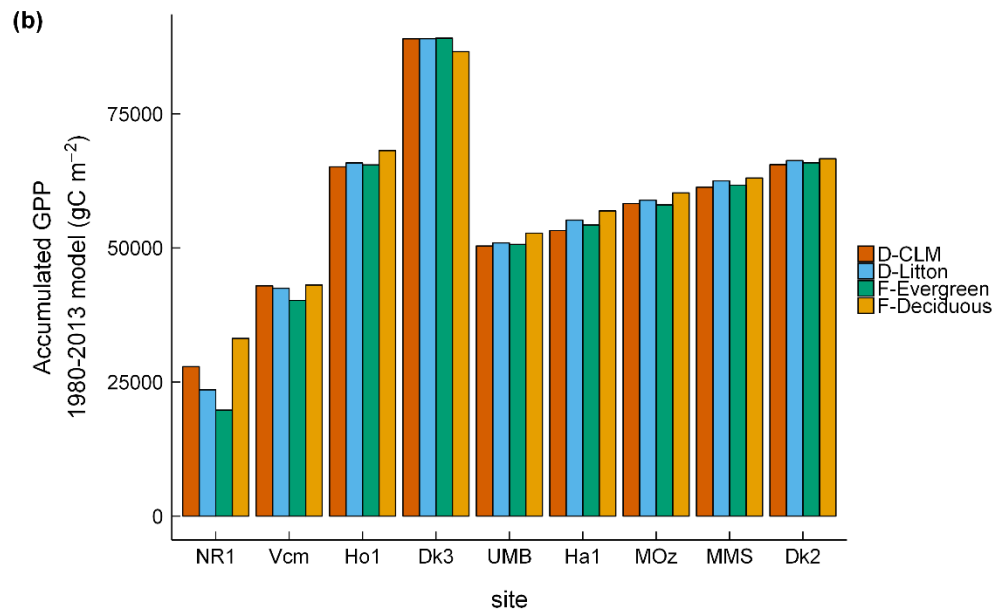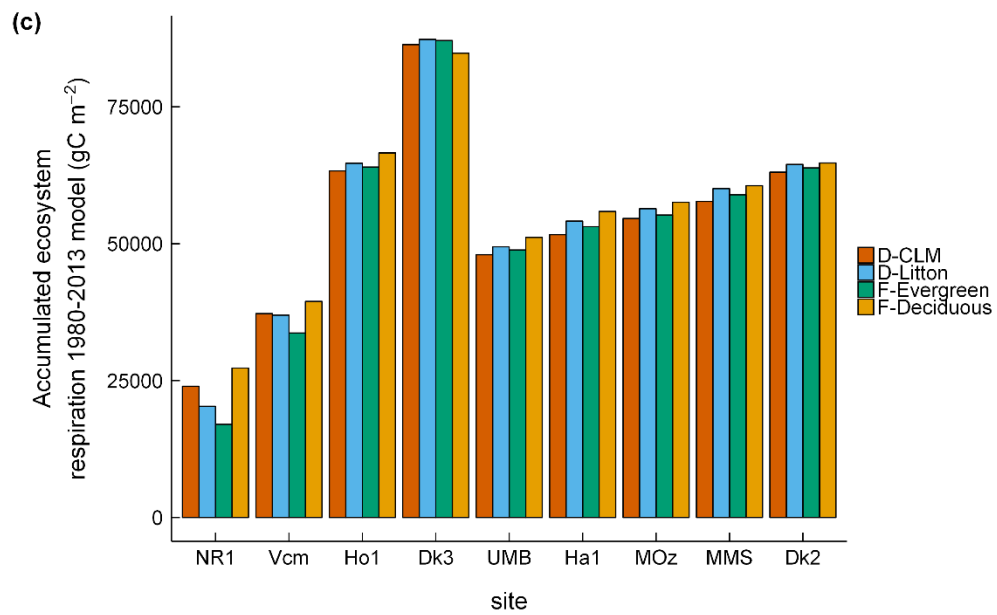

**Figure S2.** Accumulated (a) NEE, (b) GPP, (c) and ecosystem respiration during 1980-2013 for the four C allocation schemes.
